# Supplementary material for: Concept Drift Mitigation in Low-Cost Air Quality Monitoring Networks
Source: MDPI journal article supplement (doi:10.3390/s24092786), 2024-04-27
Supplement: s1 [file s1]

# Concept Drift Mitigation in Low-Cost Air Quality Monitoring Networks

Gerardo D'Elia <sup>1,2,\*</sup>, Matteo Ferro <sup>3</sup>, Paolo Sommella <sup>2</sup>, Sergio Ferlito <sup>1</sup>, Saverio De Vito <sup>1</sup> and Girolamo Di Francia <sup>1</sup>

<sup>1</sup> TERIN-FSD-SAFS Laboratory, ENEA CR-Portici, P. le E. Fermi 1, 80055 Portici, Italy

<sup>2</sup> Department of Industrial Engineering (DIIn), University of Salerno, Via Giovanni Paolo II, 132, 84084 Fisciano, Italy

<sup>3</sup> Hippocratica Imaging S.r.l., Via Giulio Pastore, 32, 84131 Salerno, Italy

\* Correspondence: gerardo.delia@eneS.it; Tel.: +39 081 7723 616

## S.1 REU plots of reference data selection for calibration update

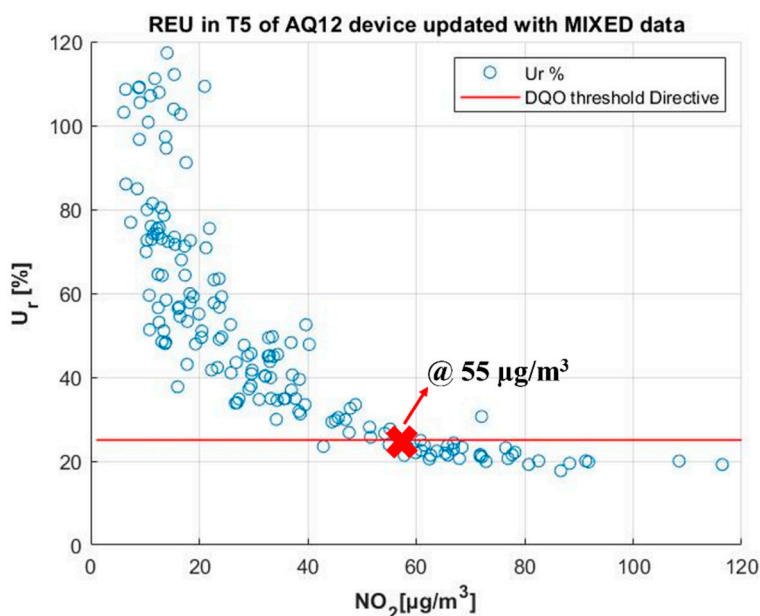

**Figure S.1. 1** Plot of Relative Expanded Uncertainties in T5 when AQ12 is re-calibrated with data of T4 (Mixed scenario).

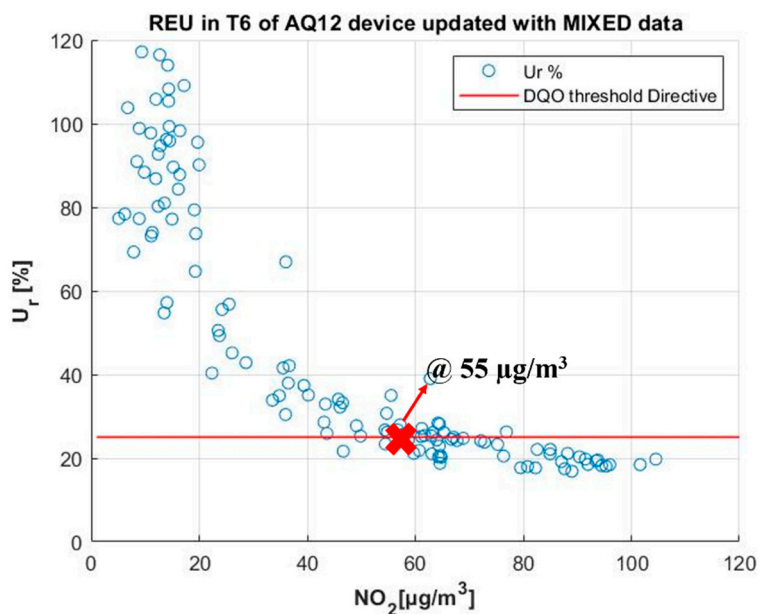

18

**Figure S.1. 2** Plot of Relative Expanded Uncertainties in T6 when AQ12 is re-calibrated with data of T4 (Mixed scenario).

19

20

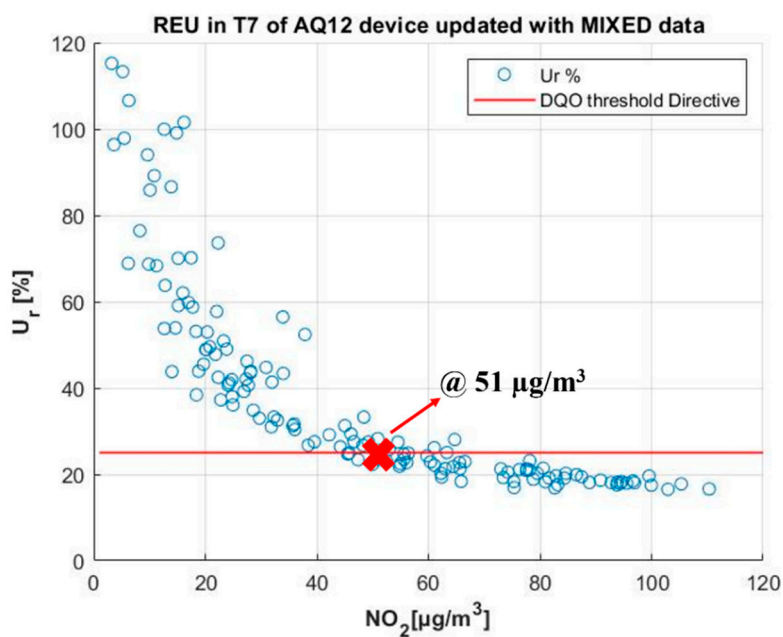

21

**Figure S.1. 3** Plot of Relative Expanded Uncertainties in T7 when AQ12 is re-calibrated with data of T4 (Mixed scenario).

22

23

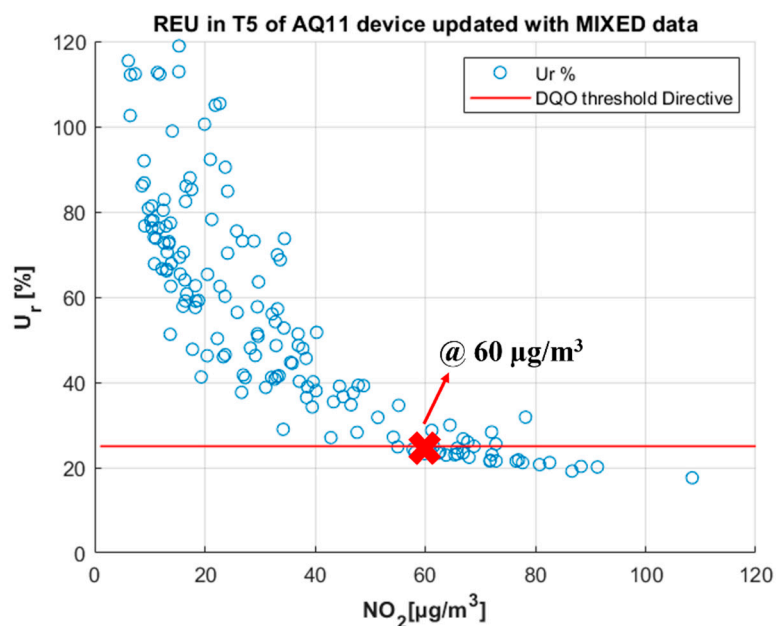

**Figure S.1. 4** Plot of Relative Expanded Uncertainties in T5 when AQ11 is re-calibrated with data of T4 (Mixed scenario).

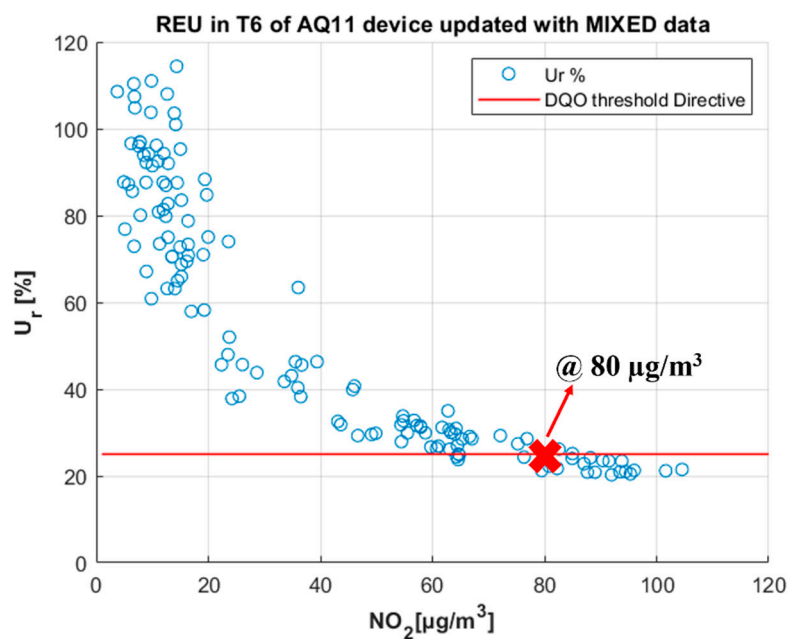

**Figure S.1. 5** Plot of Relative Expanded Uncertainties in T6 when AQ11 is re-calibrated with data of T4 (Mixed scenario).

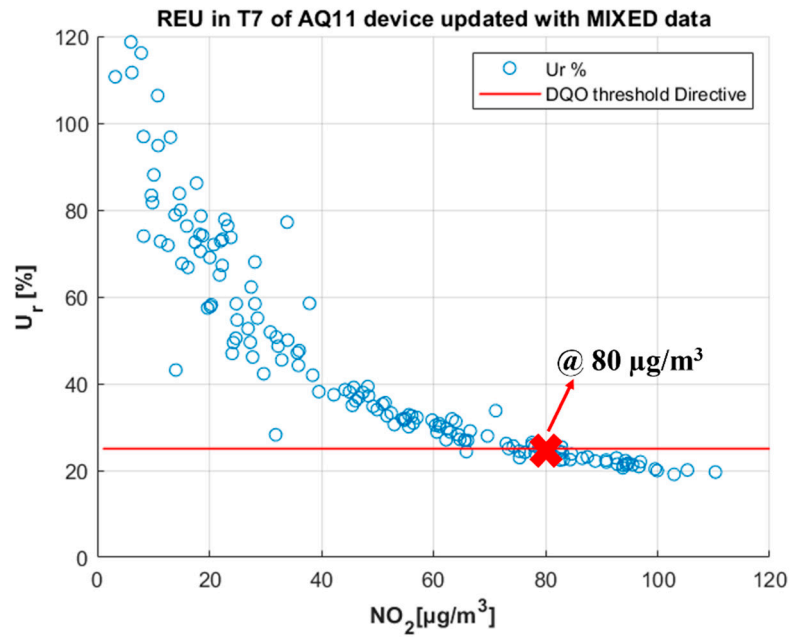

**Figure S.1. 6** Plot of Relative Expanded Uncertainties in T7 when AQ11 is re-calibrated with data of T4 (Mixed scenario).

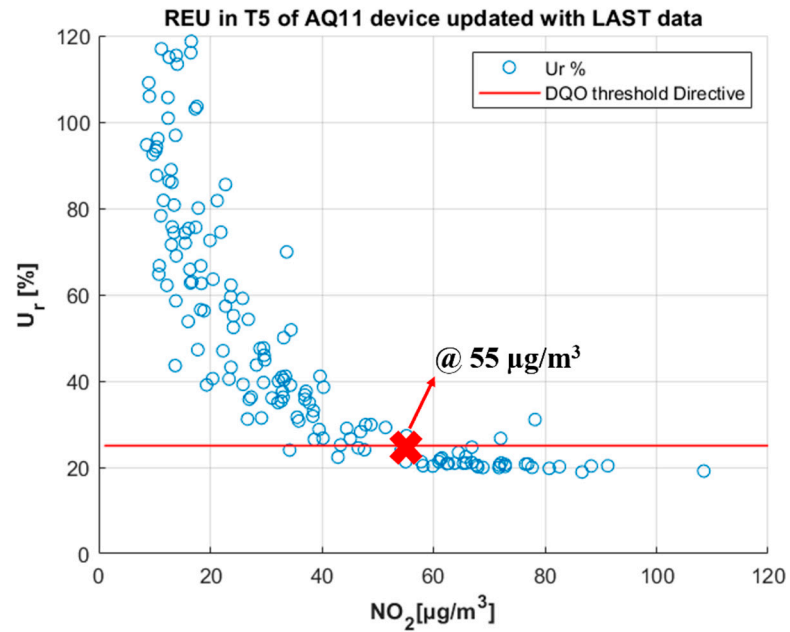

**Figure S.1. 7** Plot of Relative Expanded Uncertainties in T5 when AQ11 is re-calibrated with data of T3 (Last scenario).

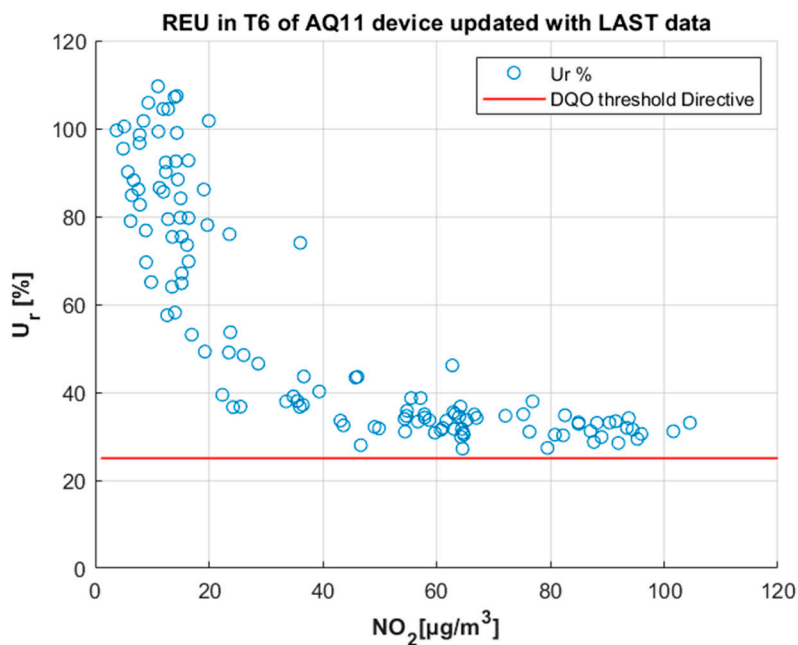

35

**Figure S.1. 8** Plot of Relative Expanded Uncertainties in T6 when AQ11 is re-calibrated with data of T3 (Last scenario).

36

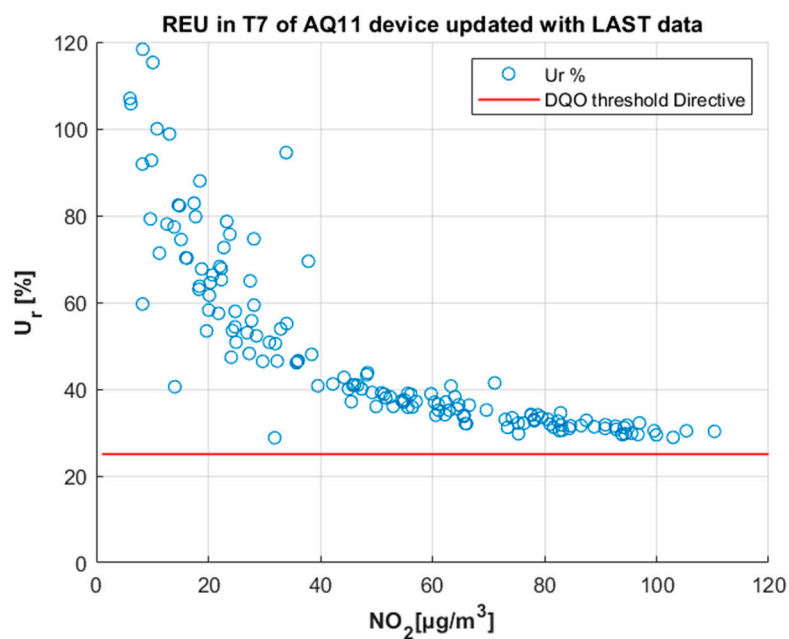

37

**Figure S.1. 9** Plot of Relative Expanded Uncertainties in T7 when AQ11 is re-calibrated with data of T3 (Last scenario).

38

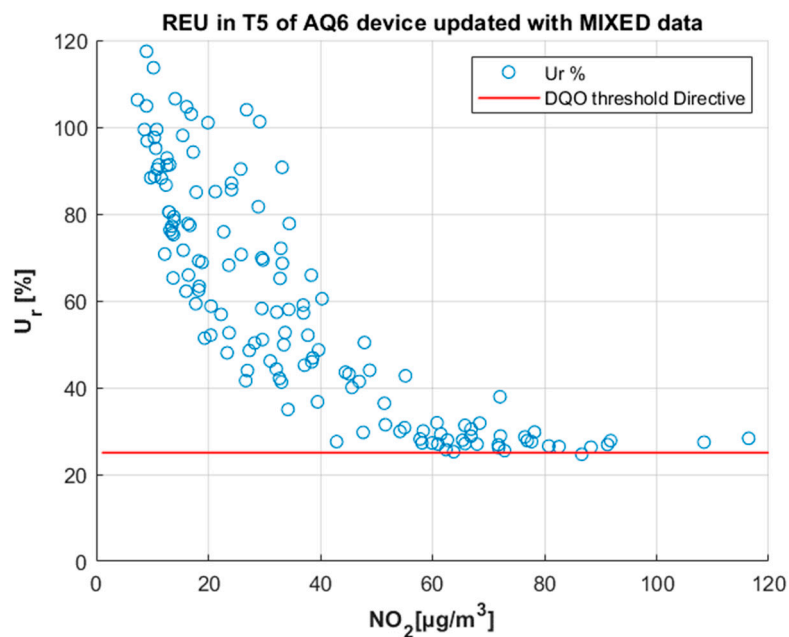

**Figure S.1. 10** Plot of Relative Expanded Uncertainties in T5 when AQ6 is re-calibrated with data of T4 (Mixed scenario).

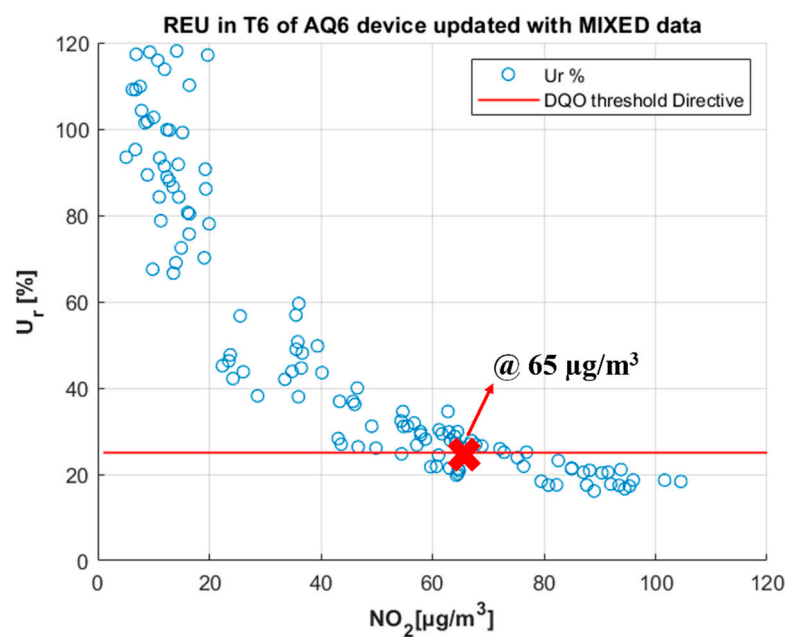

**Figure S.1. 11** Plot of Relative Expanded Uncertainties in T6 when AQ6 is re-calibrated with data of T4 (Mixed scenario).

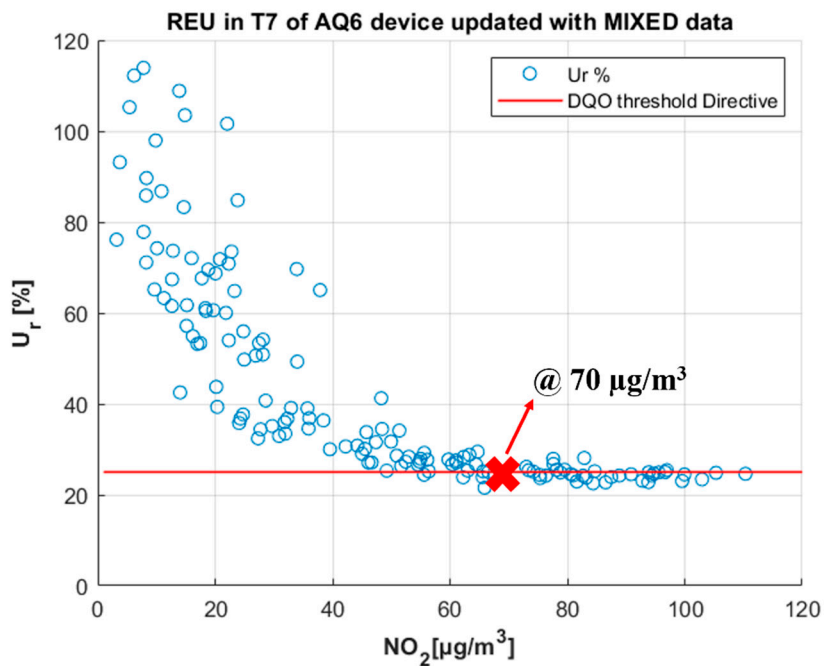

**Figure S.1. 12** Plot of Relative Expanded Uncertainties in T7 when AQ6 is re-calibrated with data of T4 (Mixed scenario).

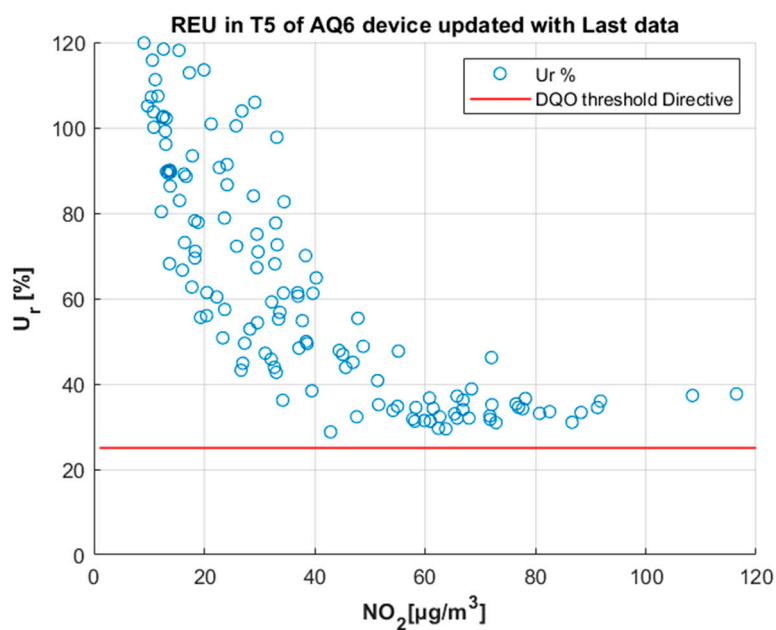

**Figure S.1. 13** Plot of Relative Expanded Uncertainties in T5 when AQ6 is re-calibrated with data of T3 (Last scenario).

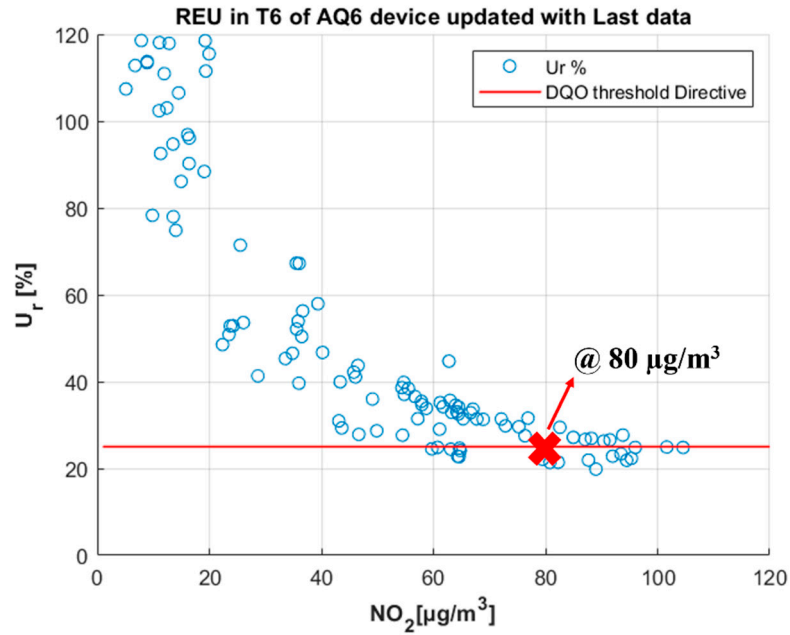

**Figure S.1. 14** Plot of Relative Expanded Uncertainties in T6 when AQ6 is re-calibrated with data of T3 (Last scenario).

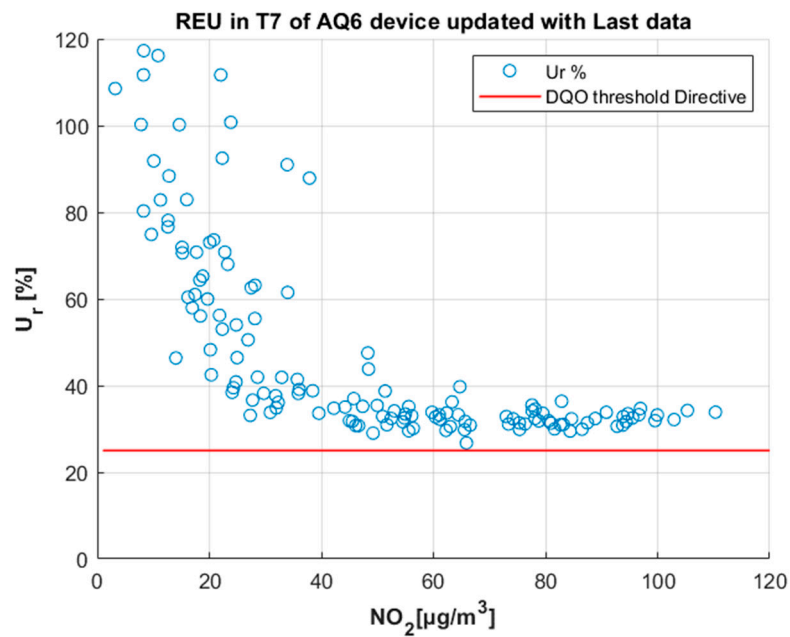

**Figure S.1. 15** Plot of Relative Expanded Uncertainties in T7 when AQ6 is re-calibrated with data of T3 (Last scenario).



## S.2 REU plots of general calibration model

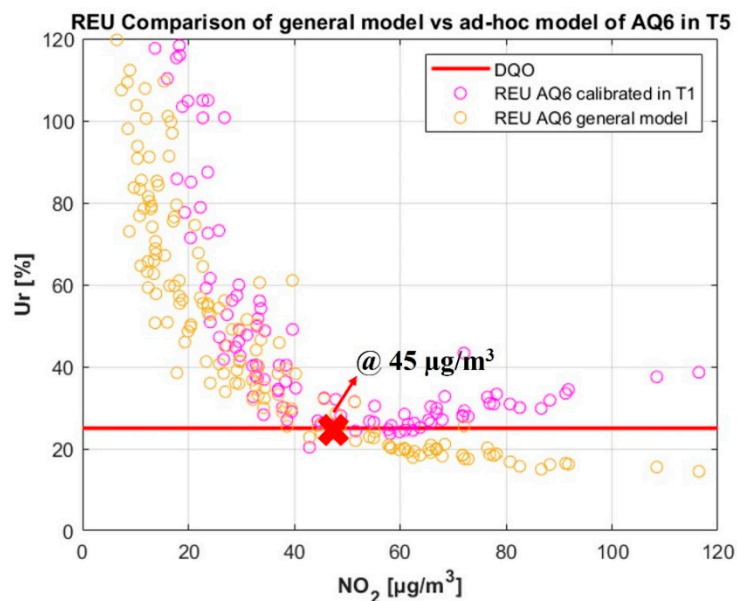

**Figure S.2. 1** Plot of Relative Expanded Uncertainties in T5 when AQ6 is re-calibrated with global calibration model.

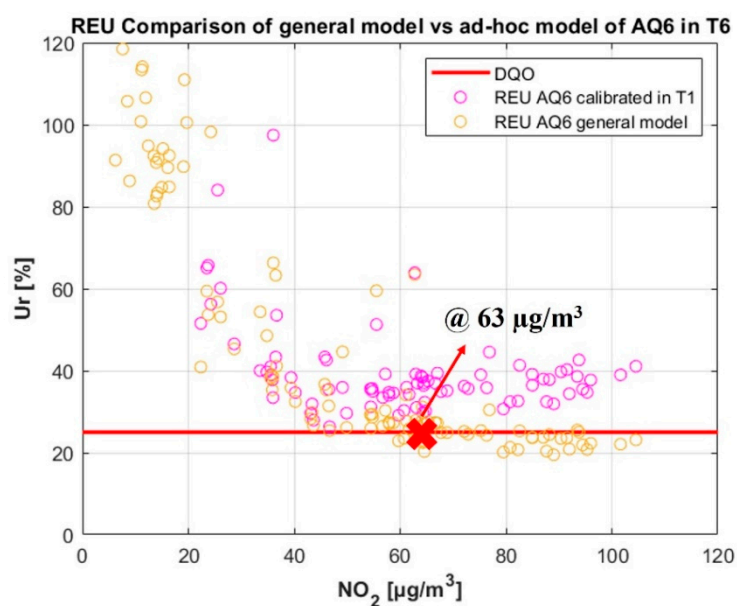

**Figure S.2. 2** Plot of Relative Expanded Uncertainties in T6 when AQ6 is re-calibrated with global calibration model.

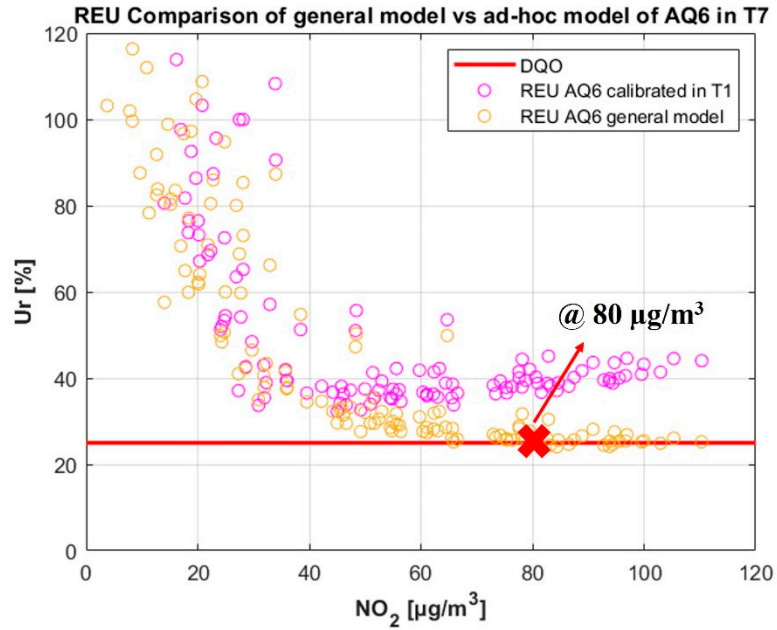

69

**Figure S.2. 3** Plot of Relative Expanded Uncertainties in T7 when AQ6 is re-calibrated with global calibration model.

70

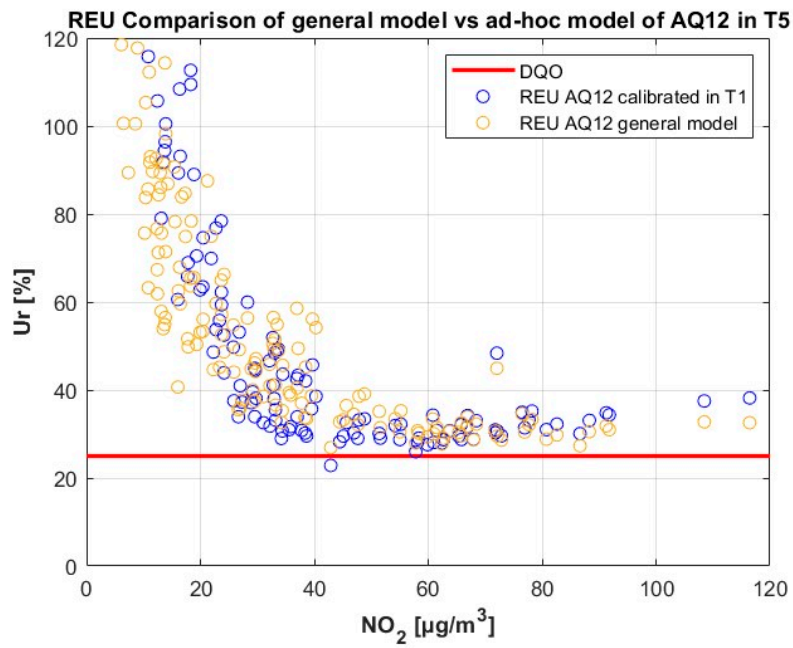

71

**Figure S.2. 4** Plot of Relative Expanded Uncertainties in T5 when AQ12 is re-calibrated with global calibration model.

72

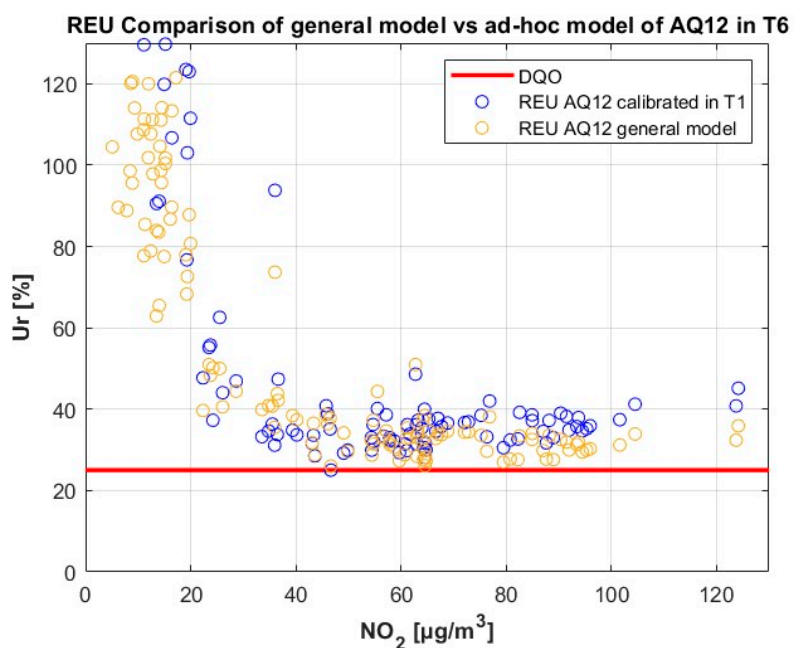

73

**Figure S.2. 5** Plot of Relative Expanded Uncertainties in T6 when AQ12 is re-calibrated with global calibration model.

74

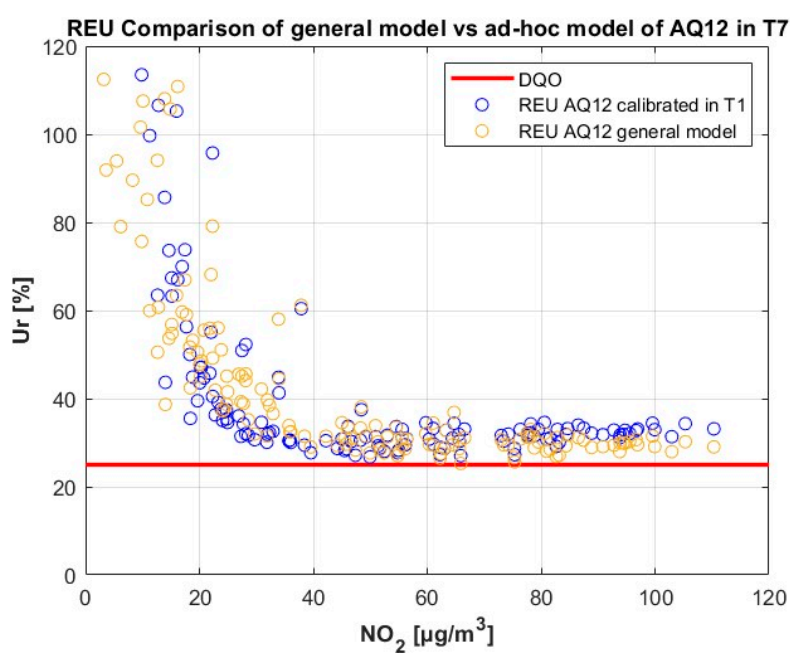

75

**Figure S.2. 6** Plot of Relative Expanded Uncertainties in T7 when AQ12 is re-calibrated with global calibration model.

76

S.3 REU plots of importance weighting calibration model

77

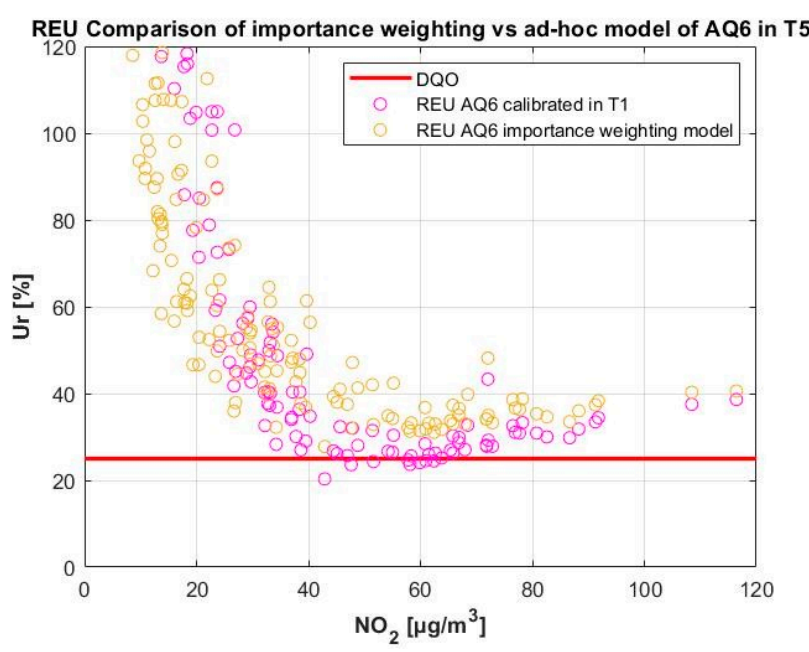

78

**Figure S.3. 1** Plot of Relative Expanded Uncertainties in T5 when AQ6 is re-calibrated with the importance weighted calibration model.

79  
80

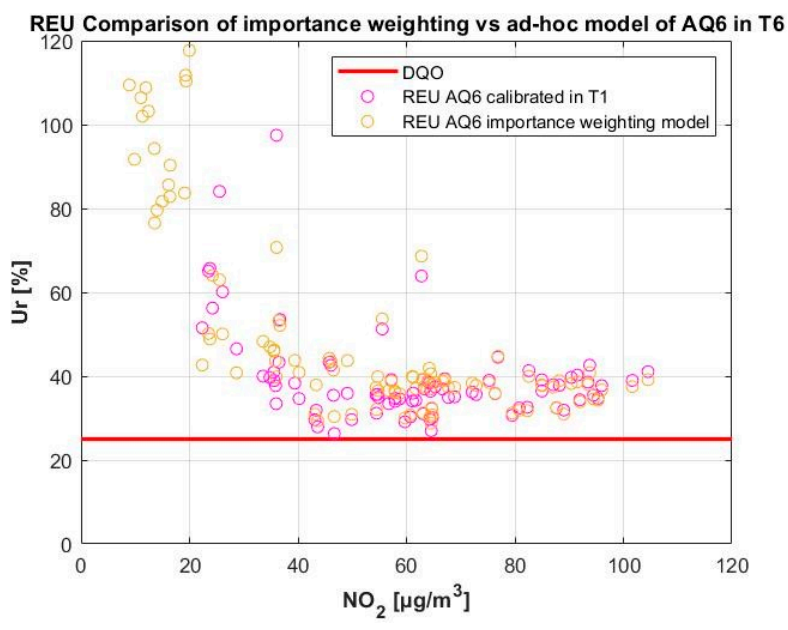

81

**Figure S.3. 2** Plot of Relative Expanded Uncertainties in T6 when AQ6 is re-calibrated with the importance weighted calibration model.

82  
83

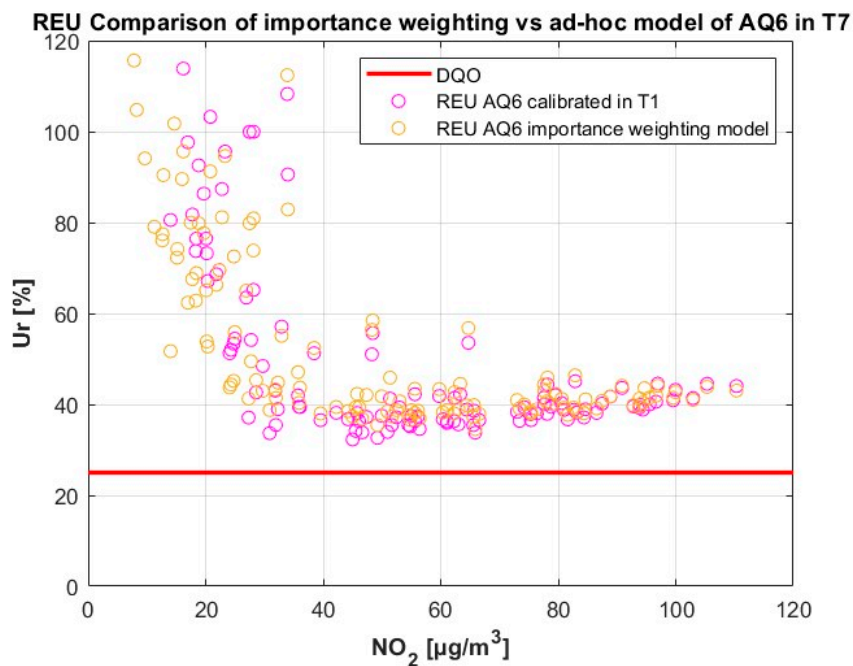

**Figure S.3. 3** Plot of Relative Expanded Uncertainties in T7 when AQ6 is re-calibrated with the importance weighted calibration model.

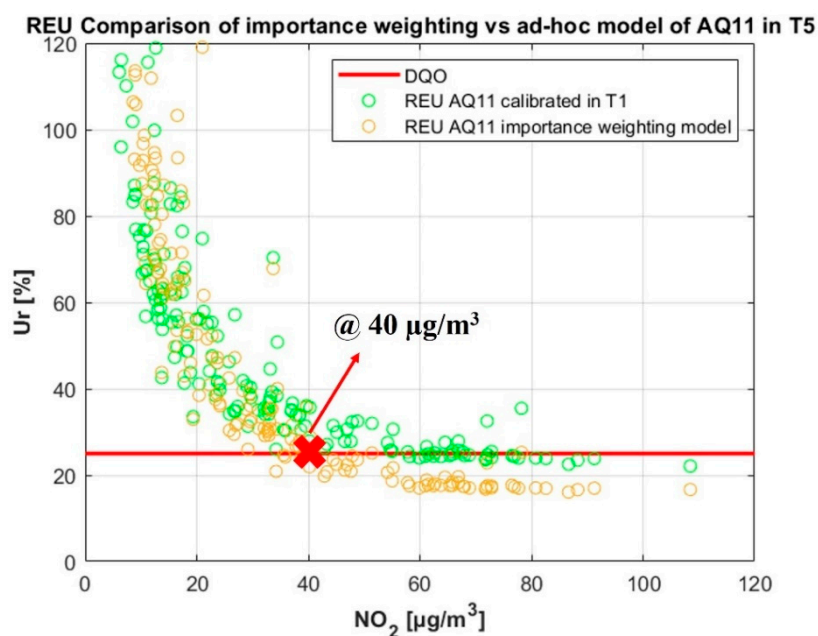

**Figure S.3. 4** Plot of Relative Expanded Uncertainties in T5 when AQ11 is re-calibrated with the importance weighted calibration model.

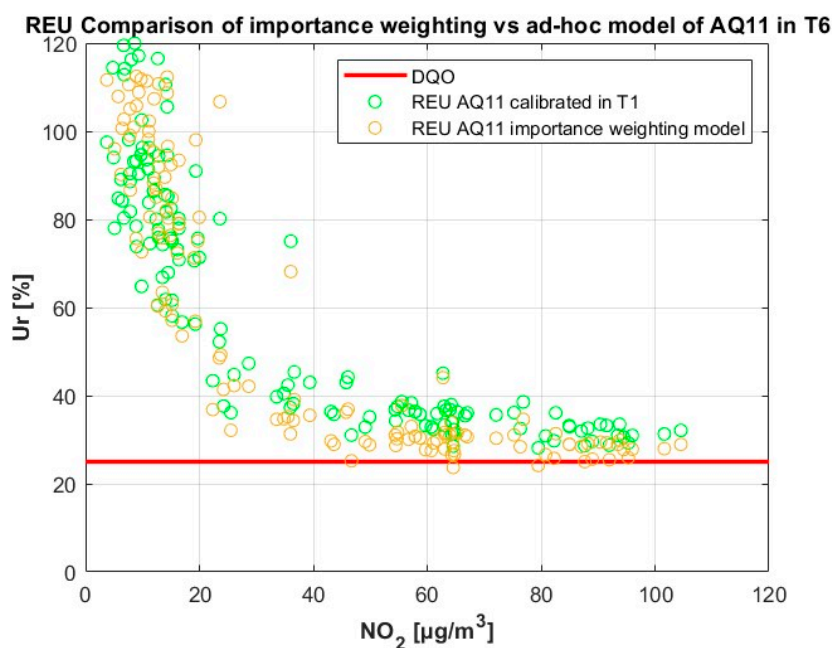

**Figure S.3. 5** Plot of Relative Expanded Uncertainties in T6 when AQ11 is re-calibrated with the importance weighted calibration model.

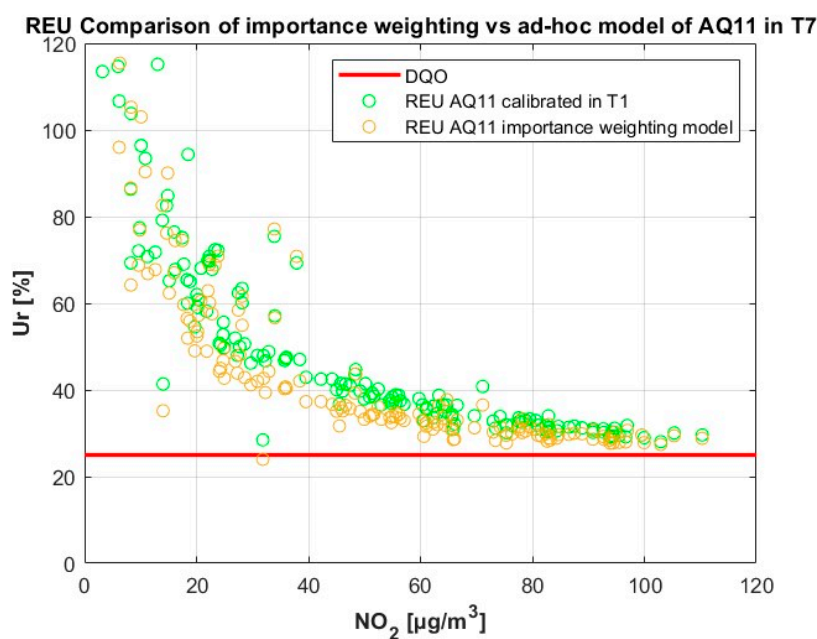

**Figure S.3. 6** Plot of Relative Expanded Uncertainties in T7 when AQ11 is re-calibrated with the importance weighted calibration model.

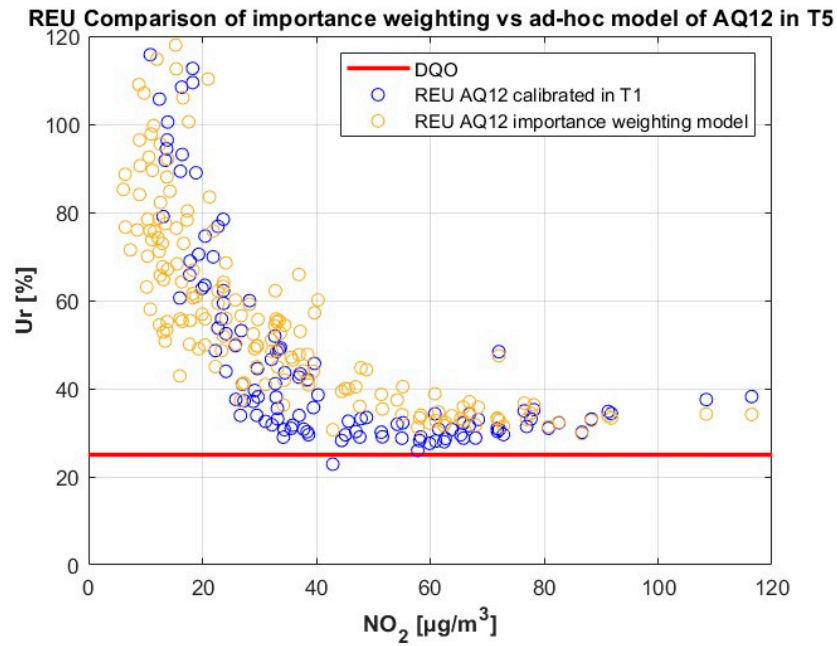

96

**Figure S.3. 7** Plot of Relative Expanded Uncertainties in T5 when AQ12 is re-calibrated with the importance weighted calibration model.

97

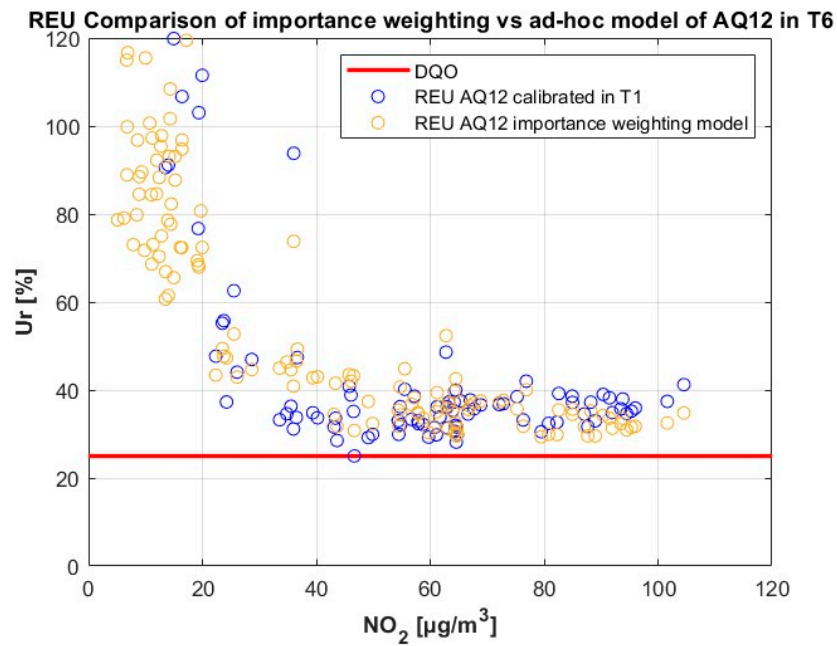

99

**Figure S.3. 8** Plot of Relative Expanded Uncertainties in T6 when AQ12 is re-calibrated with the importance weighted calibration model.

100

101



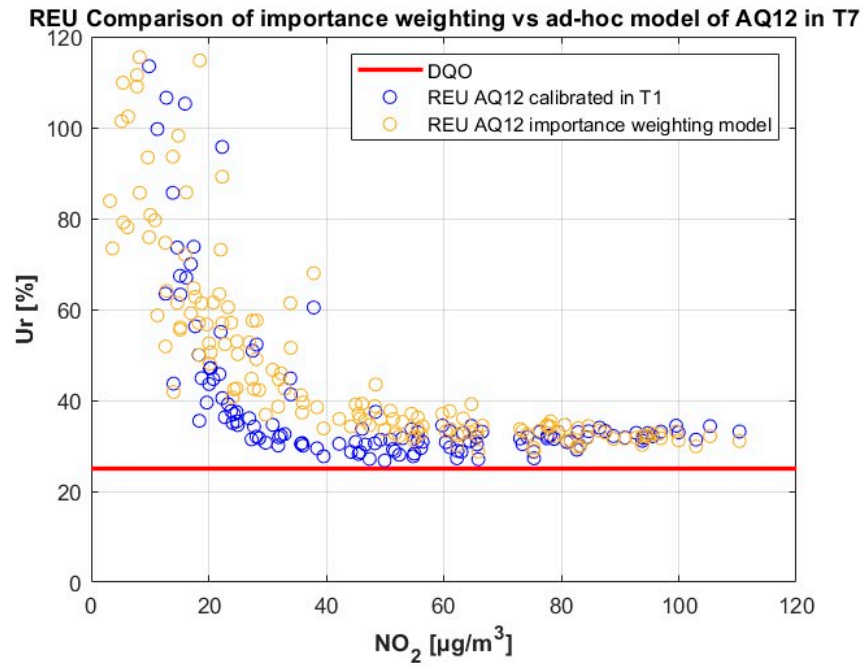

**Figure S.3. 9** Plot of Relative Expanded Uncertainties in T7 when AQ12 is re-calibrated with the importance weighted calibration model.



## S.4 REU plots of stacking ensemble calibration model

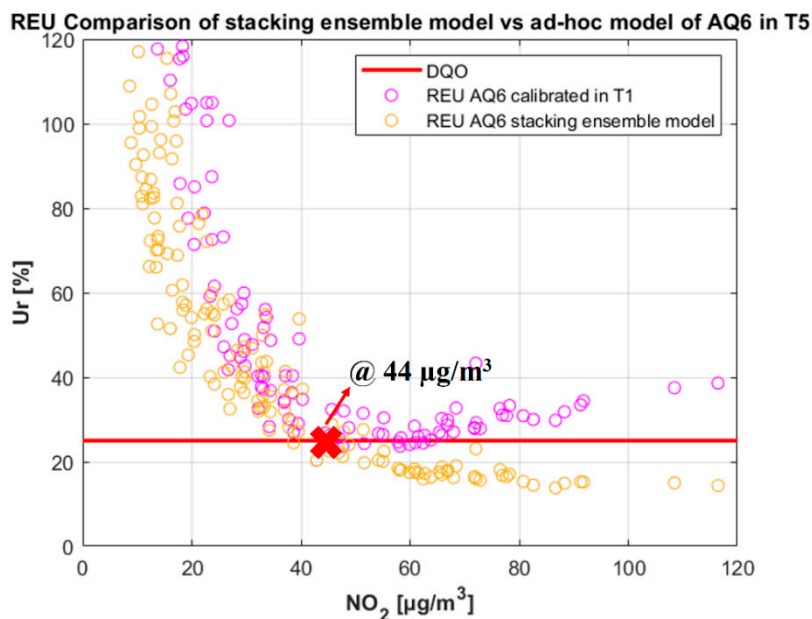

**Figure S.4. 1** Plot of Relative Expanded Uncertainties in T5 when AQ6 is re-calibrated with the stacking ensemble calibration model.

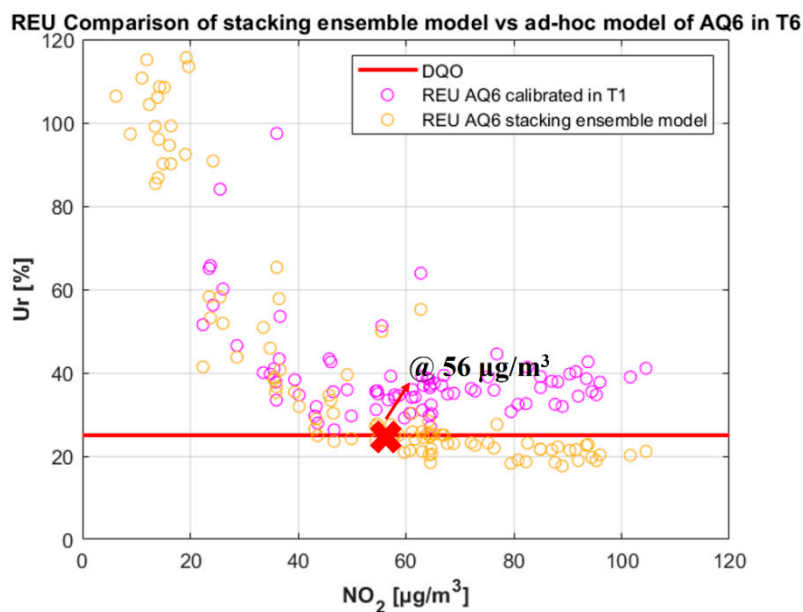

**Figure S.4. 2** Plot of Relative Expanded Uncertainties in T6 when AQ6 is re-calibrated with the stacking ensemble calibration model.

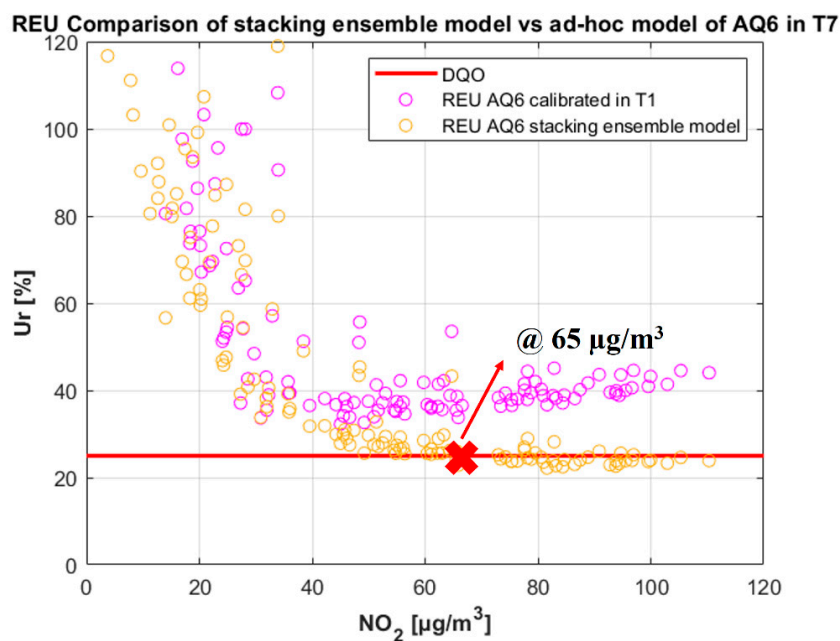

**Figure S.4. 3** Plot of Relative Expanded Uncertainties in T7 when AQ6 is re-calibrated with the stacking ensemble calibration model.

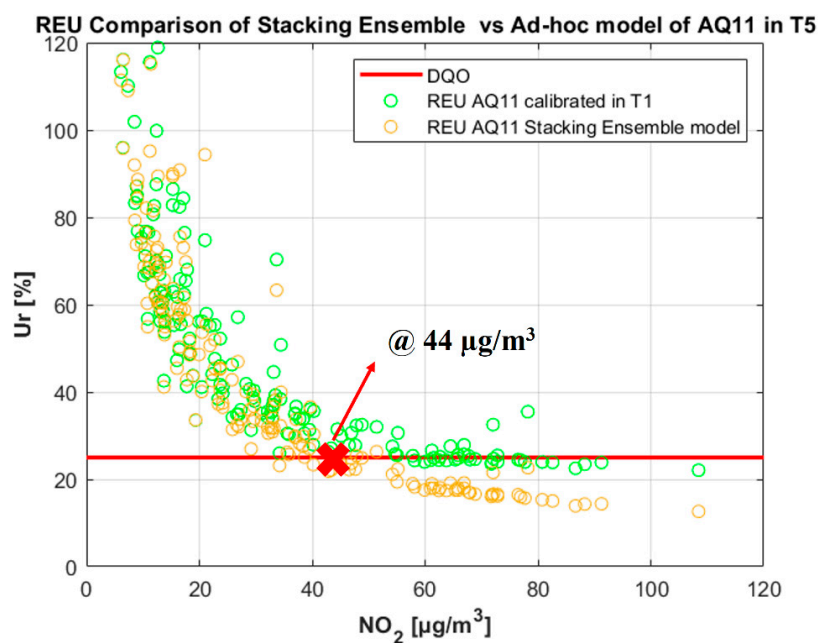

**Figure S.4. 4** Plot of Relative Expanded Uncertainties in T5 when AQ11 is re-calibrated with the stacking ensemble calibration model.

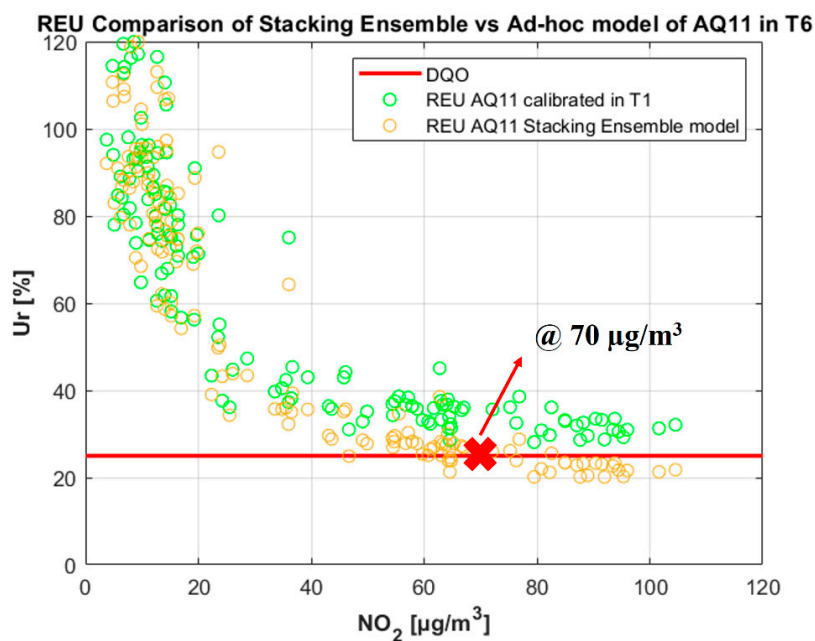

**Figure S.4. 5** Plot of Relative Expanded Uncertainties in T6 when AQ11 is re-calibrated with the stacking ensemble calibration model.

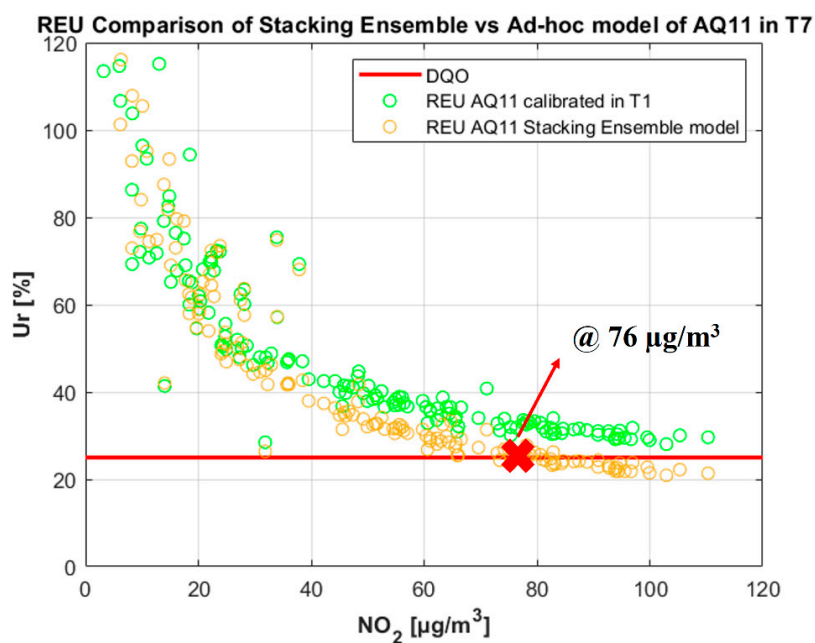

**Figure S.4. 6** Plot of Relative Expanded Uncertainties in T7 when AQ11 is re-calibrated with the stacking ensemble calibration model.

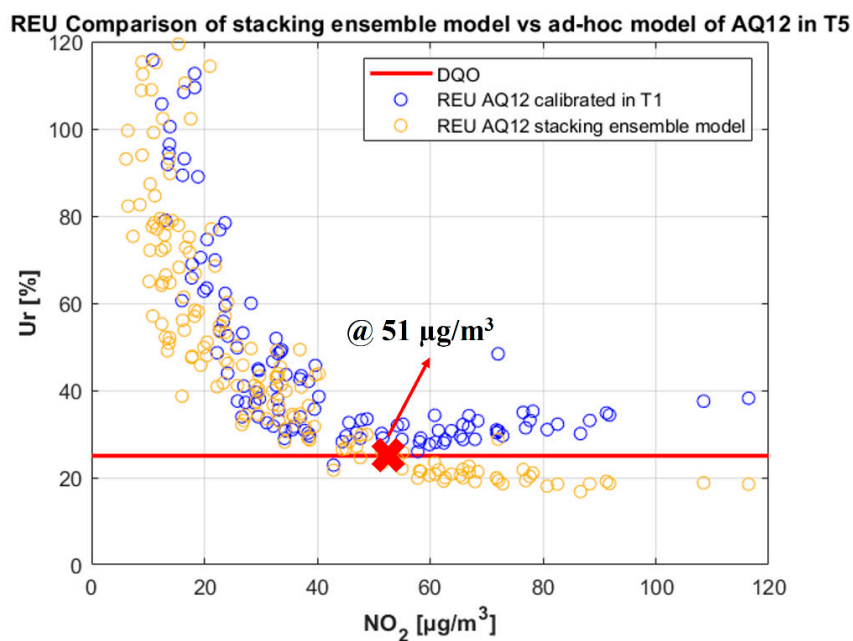

**Figure S.4. 7** Plot of Relative Expanded Uncertainties in T5 when AQ12 is re-calibrated with the stacking ensemble calibration model.

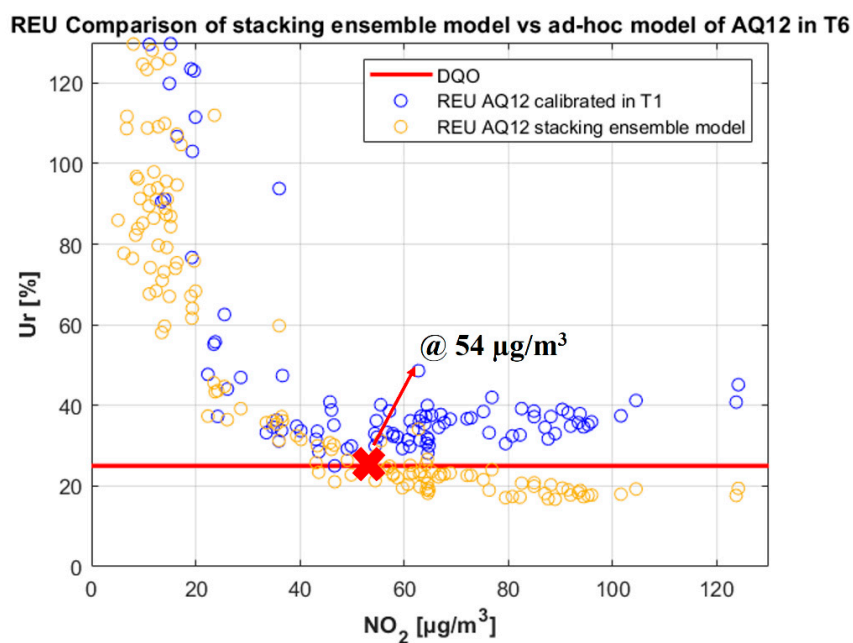

**Figure S.4. 8** Plot of Relative Expanded Uncertainties in T6 when AQ12 is re-calibrated with the stacking ensemble calibration model.

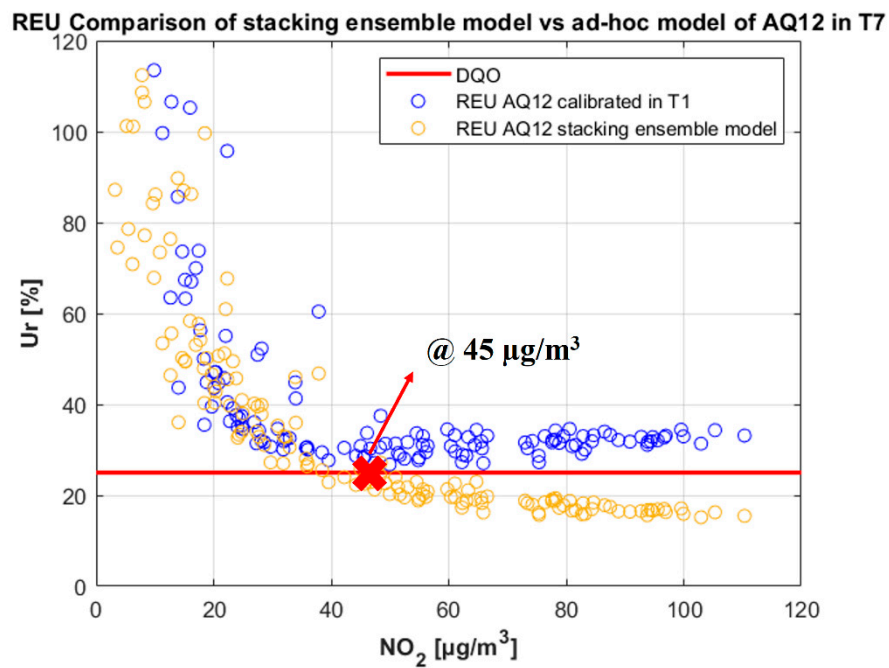

**Figure S.4. 9** Plot of Relative Expanded Uncertainties in T7 when AQ12 is re-calibrated with the stacking ensemble calibration model.
